# Supplementary material for: Q-SA√ESS: a methodology to help solvent selection for pharmaceutical manufacture at the early process development stage
Source: Royal Society of Chemistry journal article supplement (doi:10.1039/c6gc02440h), 2016-01-01
Supplement: c6gc02440h1.xlsx [file c6gc02440h1.xlsx]

## Sheet: LCI database
LCI database
		Fossil	Energy use	Global Warming Potential	Acidification	Eutrophication	Human Tox
	Fossil-based	Ethanol	4.69	2.08	0.0042	0.0006	0.05
		Methanol	7.03	1.22	0.0019	0.0003	0.08
		NMP	9.83	4.8	0.0162	0.0021	0.39
		DMC	18.8	2.69	0.0116	0.0005	0.33
		THF	48.02	5.38	0.0162	0.0017	0.63
		CPME	8.12	1.85	0.0032	0.00033	0.29
		Ethyl Acetate	10.41	1.5	0.0018	0.0025	0.05
		Toluene	0.02	1.61	0.0043	0.0005	0.04
		n-heptane	9.68	1.15	0.0036	0.0018	0.02
		from Renewables
	Bio-based	Ethanol-Stover	9.84	4.92	0.0453	0.0051	0.23
		MeOH-Bagasse	10.53	5.03	0.0026	0.0003	0.018
		NMP	10.53	9.44	0.0501	0.0088	0.47
		2-MeTHF-Stover	5.62	5.6	0.04	0.0701	0.35
		CPME	8.22	8.68	0.0583	0.0098	0.52
		Ethyl Acetate	16.5	2.9	0.048	0.0161	0.32
	UNITS		MJ/kg	kg CO2 eq /kg	kg SO2 eq /kg	kg PO43- eq /kg	kg 1,4 DCB eq/ kg

## Sheet: user input
	User input from stage 2
#	Solvent name	process solvent (kg /batch)	cleaning (kg /batch)	total (kg)	Process energy (MJ /batch)	distillation/incineration energy (MJ/batch)	API (kg /batch)
1	Ethyl Acetate	15.96	11.5	27.46	13.8	95.4	1.03
2	CPME	15.74	11.5	27.24	13.8	89.4	1.19
3	2-MeTHF-Stover	14.17	11.5	25.67	13.8	79.3	0.89
row 1 #	8
row 2 #	7
row 3 #	15

## Sheet: spent solvent management
					Energy for Distillation KJ/kg input					Total energy for incineration KJ/kg input
	Solvent	input concentration	output	output purity	reboiler	condenser	incineration bottom	total		850 °C	1200 °C
													Distillation
	CPME	0.89	0.833	0.988	759	896	2634	4289		22756.8	52509		Incineration - 850 °C
	2-MeTHF	0.76	0.723	0.99	694	827	3312	4833		27341	56014.5		Incineration - 1200 °C
	Heptane	0.9	0.899	1	740	940	2600	4280		12733	41888
	Toluene	0.9	0.899	1	843	1025	2594	4462		16476	47599.5
	EtOAc	0.82	0.879	0.93	1145	1256	2755	5156		34404	63071
	MeOH	0.5	0.505	0.99	1463	1675	4325	7463		46389	75437.5
	EtOH	0.5	0.55	0.91	1385	1610	4561	7556		44060.5	73346.5
	THF	0.5	0.532	0.94	315	501	4658	5474		38392	67082.5
	NMP	0.5	0.503	0.2	973	1231	4125	6329		55043.5	84251.5
	DMC	0.76	0.899	0.844	649	786	2623	4058		40212	68956.5
row number		1		4289
	mass input (kg)	solvent	options	result MJ
	18.5	CPME	Distillation	79.3465

## Sheet: Decision making table
		Environmental			Social	Economics
solvent	mass (kg/batch)	GWP (kg CO2 eq)	Acidification (kg SO2 eq)	Eutrophication (kg PO43- eq)	Human Tox (kg DCB eq)	Total Energy per batch (MJ)	API (kg/batch)
Ethyl Acetate	27.46	41.19	0.049428	0.06865	1.373	109.2	1.03
CPME	27.24	50.394	0.087168	0.0089892	7.8996	103.2	1.19
2-MeTHF-Stover	25.67	143.752	1.0268	1.79947	8.9845	93.1	0.89
	Most desired
	Least desired

## Sheet: visual report
	solvent	mass (kg/batch)	GWP (kg CO2 eq)	Acidification (kg SO2 eq)	Eutrophication (kg PO43- eq)	Human Tox (kg DCB eq)	Total Energy per batch (MJ)	API (kg/batch)
	Ethyl Acetate	90	257.4	1.494	0.01764	30.15	4026	2.6
	2-MeTHF	65	364	1.5015	0.24375	11.05	2275.3	2.7
	CPME	75	138.75	0.23775	0.02475	21.75	2586.5	2.5
	MeOH	80	97.6	0.1504	0.02	6.08	4062.4	2
		Most desired
		Least desired
			Environmental			Social	Economics
			Planet			People	Profit

## Sheet: Disclaimer
	This Excel spreadsheet is intended to be used as integral part of our Solvent selection methodolgy (Q-SA√ESS).
	This spreadsheet is not intended to replace a full detailed LCA, but rather it gives indications on the sustainability of a solvent for a specific process, in a more expedite manner.
	The authors do not take responsibility for misuse or misinterpretation of the results.
	This copy of Q-SA√ESS is intended to facilitate the peer-review process only.
	No parts of Q-SA√ESS can be copied, edited or distributed without prior authorisation from the authors.
