# Supplementary material for: Q-SA√ESS: a methodology to help solvent selection for pharmaceutical manufacture at the early process development stage
Source: Royal Society of Chemistry journal article supplement (doi:10.1039/c6gc02440h), 2016-01-01
Supplement: c6gc02440h2.pdf [file c6gc02440h2.pdf]

### Sensitivity Analysis – life cycle assumptions

| Solvent              | Process details                                                                                                          | LCA system                                                                                                                                                                                                                                                                                                                                                                                                                                                 | Data source                                                                                                  |
|----------------------|--------------------------------------------------------------------------------------------------------------------------|------------------------------------------------------------------------------------------------------------------------------------------------------------------------------------------------------------------------------------------------------------------------------------------------------------------------------------------------------------------------------------------------------------------------------------------------------------|--------------------------------------------------------------------------------------------------------------|
| <b>Ethyl Acetate</b> | Production of EtOAc from the reaction of ethanol and acetic acid                                                         | From raw materials to final product. Manufacture of acetic acid and fossil-ethanol from Gabi database; and <b>1 kg ethyl acetate</b> modelled from ethanol in Europe                                                                                                                                                                                                                                                                                       | EcoInvent<br>Combined GaBi engineering database (ethanol, acetic acid); Ecoinvent-European plant (EtOAc)     |
|                      | Process <sup>a</sup> for producing ethyl acetate by <i>dehydrogenation of ethanol</i> using a homogenous catalyst system | Production of <b>1 kg ethyl acetate</b> (81% yield) according to process <sup>a</sup> ; with ethanol production modeled from Gabi datasets. LCA modelling of catalyst not included                                                                                                                                                                                                                                                                         | Combined GaBi engineering database (fossil-ethanol); and Nielsen et al. 2013 (patent) <sup>a</sup>           |
| <b>2-MeTHF</b>       | Corn stover                                                                                                              | From US corn field to harvesting, generation of straw, collection of stover and bio-chemical prod. of levulinic acid as intermediate followed by the synthesis of <b>1 kg of 2-MeTHF</b> ; transportation not included                                                                                                                                                                                                                                     | LCA models described in Khoo et al. 2015 <sup>b</sup>                                                        |
|                      | Sugarcane bagasse                                                                                                        | From Brazilian sugarcane plantation to milling process and generation of bagasse, bio-chemical prod. of levulinic acid as intermediate followed by the synthesis of <b>1 kg of 2-MeTHF</b> ; transportation not included                                                                                                                                                                                                                                   |                                                                                                              |
|                      | Rice straw (RS)                                                                                                          | From China rice paddy field to harvesting, generation of straw, collection of straw and bio-chemical prod. of levulinic acid as intermediate followed by the synthesis of <b>1 kg of 2-MeTHF</b> ; transportation not included                                                                                                                                                                                                                             |                                                                                                              |
| <b>Fossil-CPME</b>   | Synthesized from cyclopentene and fossil-methanol                                                                        | From refinery co-products; cyclopentene produced from pyrolysis gasoline. Synthesis of <b>1 kg CPME</b> from fossil-MeOH and cyclopentene with 89% yield                                                                                                                                                                                                                                                                                                   | Ecoinvent                                                                                                    |
| <b>Bio-CPME</b>      | Synthesized from cyclopentene and RS-methanol                                                                            | Streamlined LCA, from farm cultivation of rice, harvesting and straw as by-product to RS-Methanol; cyclopentene produced from pyrolysis gasoline. Synthesis of <b>1 kg CPME</b> from RS-MeOH and cyclopentene with 89% yield                                                                                                                                                                                                                               | US NREL (RS)<br>RS-MeOH from Xiao et al. <sup>c</sup> ;<br>GaBi life cycle database (fossil-resources)       |
|                      | Synthesized from “bio”-cyclopentene (from cyclopentanol derived from stover) and RS-methanol                             | Streamlined LCA, from farm cultivation of rice, harvesting and straw as by-product to RS-Methanol; cyclopentene produced from cyclopentanol which is produced from hydrogenation of furfural. It was estimated that 9.06 kg stover is needed per kg furfural <sup>d</sup> . Synthesis of <b>1 kg CPME</b> from RS-MeOH and cyclopentene with 89% yield; energy requirements for bio-processes involved in converting stover to cyclopentanol not included. | US NREL (RS and stover); RS-MeOH from Xiao et al. <sup>c</sup> ; GaBi life cycle database (fossil-resources) |

<sup>a</sup> Nielsen, M., Kammer, A., Junge, H., Beller, M. (2013) *A process for producing ethyl acetate by dehydrogenation of ethanol using a homogenous catalyst system* (Patent WO 2013079659 A1), <http://www.google.com/patents/WO2013079659A1?cl=en>

<sup>b</sup> Khoo, H.H., Wong, L.L., Tan, J., Isoni, V., Sharratt, P. (2015) Synthesis of 2-Methyl tetrahydrofuran from various lignocellulosic feedstocks: sustainability assessment via LCA. *Res. Conserv. Rec.* 95: 174 – 182.

<sup>c</sup> Xiao, J., Shen, L., Zhang, Y., Gu, J. (2009) Integrated Analysis of Energy, Economic, and Environmental Performance of Biomethanol from Rice Straw in China, *Ind. Eng. Chem. Res.* 48, 9999 – 10007.

<sup>d</sup> Zhou, M., Zhu, H., Niu, L., Xiao, G., Xiao, R. (2014) Catalytic Hydroprocessing of Furfural to Cyclopentanol Over Ni/CNTs Catalysts: Model Reaction for Upgrading of Bio-oil, *Catal Lett.* 144, 235 – 241.

### Uncertainty Analysis – one table

| Changes                                        |        | 10% Increase          |                   | 10% Reduce            |                   |
|------------------------------------------------|--------|-----------------------|-------------------|-----------------------|-------------------|
|                                                |        | Yield/ Bio-Conversion | Energy efficiency | Yield/ Bio-Conversion | Energy efficiency |
| <b>Estimated effects in life cycle impacts</b> |        |                       |                   |                       |                   |
| <b>EtOAc (fossil)</b>                          | GWP    | 8% reduce             | 2% reduce         | 7.5% increase         | 1.6% increase     |
|                                                | Energy | 4% reduce             | 13% reduce        | 4% increase           | 12.3% increase    |
| <b>2MeTHF (bio)</b>                            | GWP    | 10% reduce            | 1.3% reduce       | 9.9% increase         | 1.6% increase     |
|                                                | Energy | 9.9% reduce           | 7.2% reduce       | 10% increase          | 7.2% increase     |
| <b>CPME (mix bio + fossil)</b>                 | GWP    | 11% reduce            | 3% reduce         | 11% increase          | 2.6% increase     |
|                                                | Energy | 10% reduce            | 1% reduce         | 9.05% increase        | 1% increase       |
